# Supplementary material for: Bacitracin-assisted synthesis of spherical BiVO4 nanoparticles with C doping for remarkable photocatalytic performance under visible light
Source: Royal Society of Chemistry journal article supplement (doi:10.1039/c9ce01908a), 2020-01-01
Supplement: c9ce01908a1.pdf [file c9ce01908a1.pdf]

## SUPPORTING INFORMATION

### Bacitracin assisted synthesis of spherical BiVO<sub>4</sub> nanoparticles with C doping for remarkable photocatalytic performance under visible light

Tianyong Zhang<sup>a,b,c</sup>, Yiwei Liu<sup>a</sup>, Shuang Jiang<sup>a\*</sup>, Bin Li<sup>a,c\*</sup>, Jingchao Wang<sup>a</sup>, Xiao Shao<sup>a</sup>,

Di Wang<sup>a</sup>, Kaijun Wang<sup>a</sup>, Ziran Yan<sup>a</sup>

<sup>a</sup> Tianjin Key Laboratory of Applied Catalysis Science and Technology, School of Chemical Engineering and Technology, Tianjin University, Tianjin 300354 (P.R. China).

<sup>b</sup> Collaborative Innovation Center of Chemical Science and Engineering, Tianjin 300354 (P.R. China).

<sup>c</sup> Tianjin Engineering Research Center of Functional Fine Chemicals, Tianjin 300072 (P.R. China).

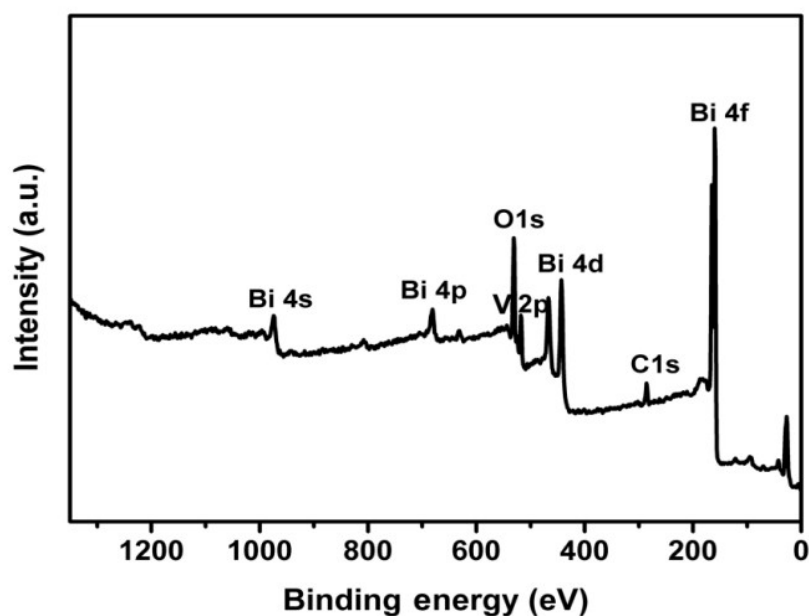

Fig. S1 XPS survey spectrum of T-300 sample

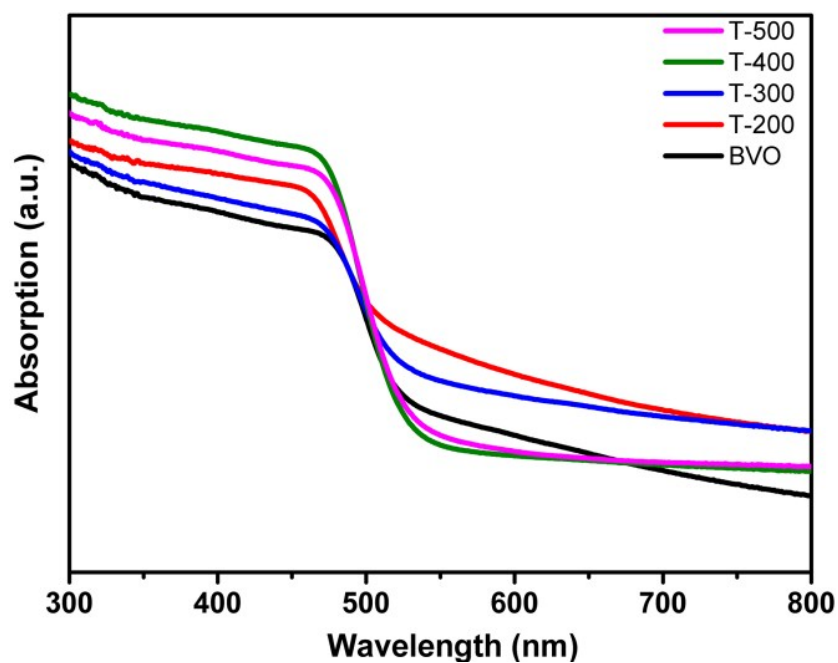

**Fig. S2** UV-vis diffuse reflectance spectra of BVO and as-prepared BiVO<sub>4</sub> using bacitracin as template with different calcination temperatures (T-200, T-300, T-400 and T-500, respectively)

**Table S1** Surface area, pore volume, and pore diameter distributions of BVO, T-25, T-200, T-300, T-400 and T-500

| Material | Surface area<br>(m <sup>2</sup> •g <sup>-1</sup> ) | Pore volume<br>(cm <sup>3</sup> •g <sup>-1</sup> ) | Pore diameter<br>(nm) |
|----------|----------------------------------------------------|----------------------------------------------------|-----------------------|
| BVO      | 2.23                                               | 0.01                                               | 7.23                  |
| T-25     | 1.23                                               | -                                                  | -                     |
| T-200    | 13.86                                              | 0.04                                               | 8.04                  |
| T-300    | 13.75                                              | 0.05                                               | 9.31                  |
| T-400    | 5.74                                               | 0.03                                               | 14.49                 |
| T-500    | 5.57                                               | 0.03                                               | 18.99                 |

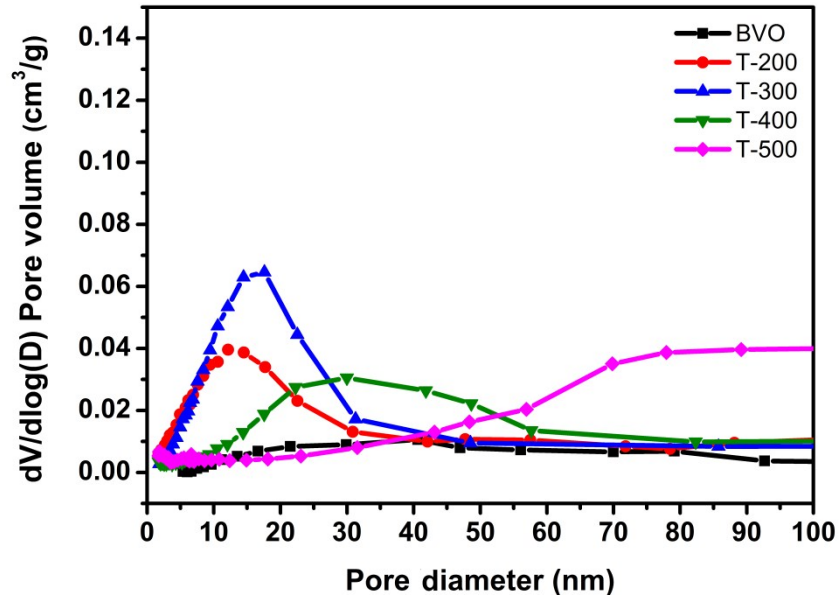

Fig. S3 Pore diameter distributions of BVO and as-prepared BiVO<sub>4</sub> using bacitracin as template with different calcination temperatures ( T-200, T-300, T-400 and T-500, respectively)

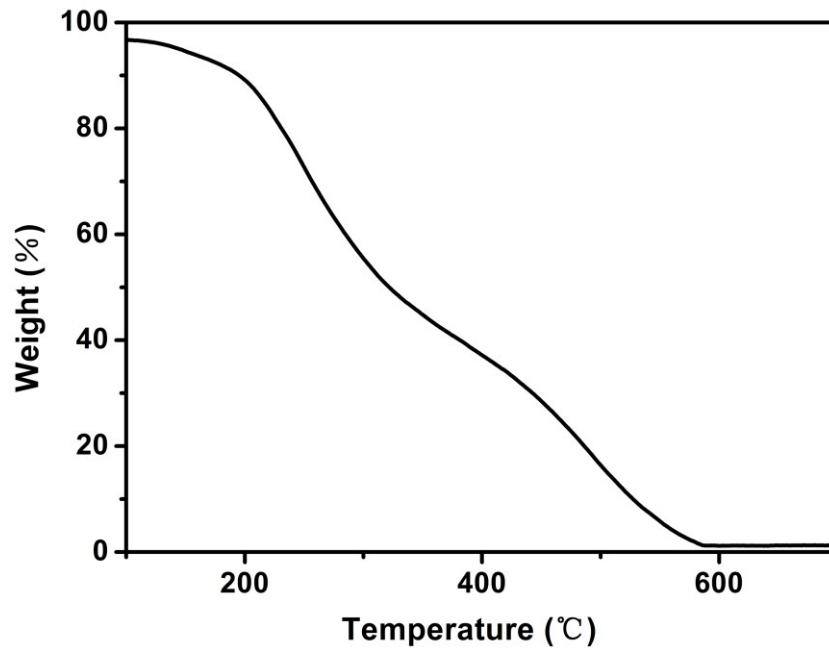

Fig. S4 TGA curve of bacitracin

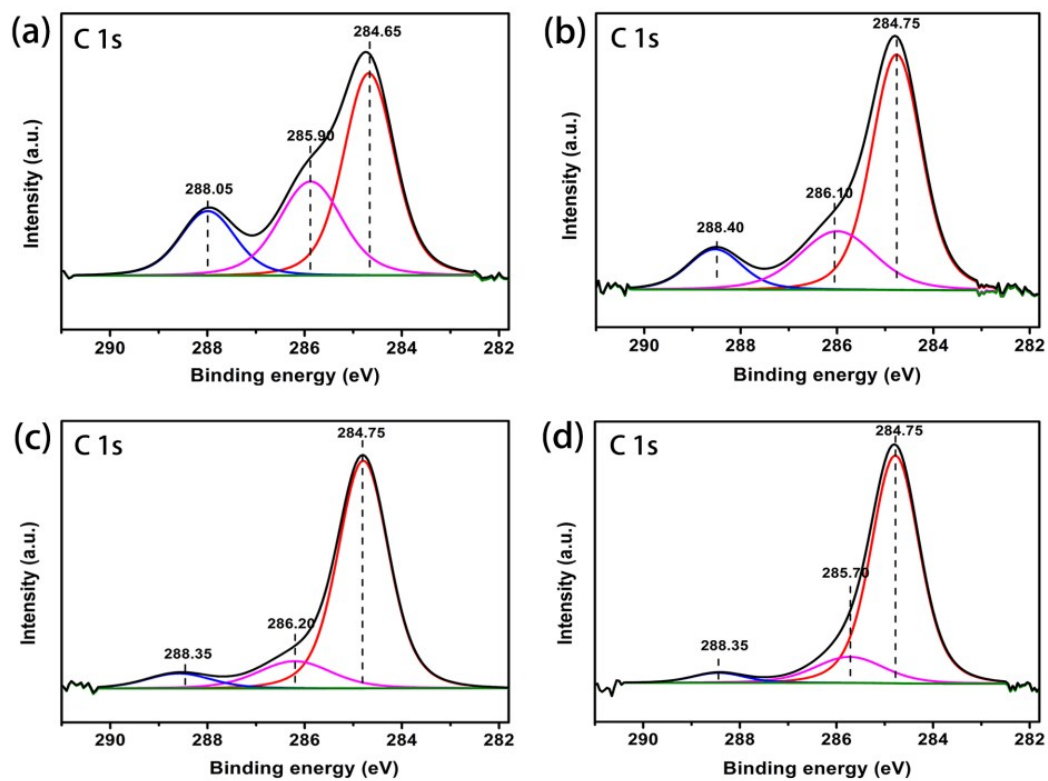

Fig. S5 High-resolution XPS spectra of C1s ((a): T-25, (b): T-200, (c): T-400,(d): T-500.

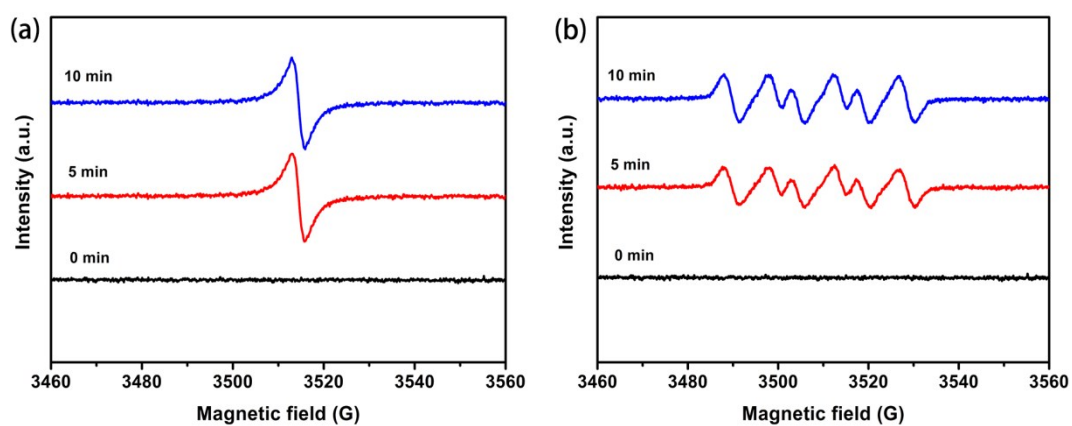

Fig. S6 EPR spectra of radical adducts with DMPO in T-300 system at different irradiation time ((a):  $h^+$ ; (b):  $\bullet O_2^-$ )
